# Supplementary material for: Parthenolide Relieves Pain and Promotes M2 Microglia/Macrophage Polarization in Rat Model of Neuropathy
Source: Hindawi journal article supplement (doi:10.1155/2015/676473), 2015-01-01
Supplement: f1 [file 676473.f1.pdf]

**Analgesic effect of parthenolide (PTL) and associated changes in the glial cells, pronociceptive and antinociceptive factors, and correlated signaling pathways activation at 7 days, after CCI**

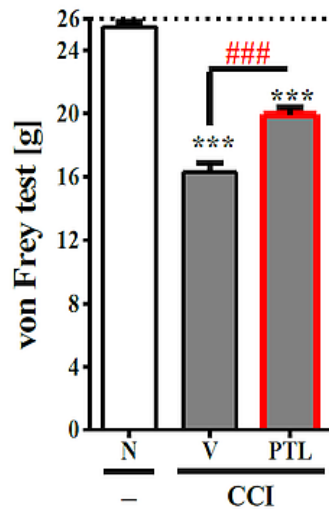

**IPSILATERAL DORSAL HORN OF THE LUMBAR SPINAL CORD**

| <i>i.t.</i> | GLIA MARKERS |      | PRONOCICEPTIVE FACTORS |      |       |      | ANTINOCICEPTIVE FACTORS |       | PROTEIN KINASES |        | TRANSCRIPTION FACTORS |         |
|-------------|--------------|------|------------------------|------|-------|------|-------------------------|-------|-----------------|--------|-----------------------|---------|
|             | IBA1         | GFAP | IL-1 $\beta$           | IL-6 | IL-18 | iNOS | IL-10                   | TIMP1 | p-p38           | ERK1/2 | NF- $\kappa$ B        | p-STAT3 |
| V-CCI       | ↑↑↑          | ↑↑↑  | —                      | ↑    | ↑↑↑   | ↑    | —                       | —     | ↑               | ↑↑↑    | ↑↑                    | ↑↑      |
| PTL-CCI     | ↑            | —    | ↓↓↓                    | —    | ↓     | ↓    | ↑↑↑                     | ↑↑    | ↓↓↓             | ↓↓↓    | ↓                     | ↑       |
